# Supplementary material for: Cardiac Device Therapy in Patients with Chronic Kidney Disease: An Update
Source: MDPI journal article supplement (doi:10.3390/jcm13020516), 2024-01-17
Supplement: s1 [file s1]

| Study design                                                                | Population characteristics                                                         | Principal findings                                                                                                                                                                                                                                                                                                                                                                                                                                                                                                                            |
|-----------------------------------------------------------------------------|------------------------------------------------------------------------------------|-----------------------------------------------------------------------------------------------------------------------------------------------------------------------------------------------------------------------------------------------------------------------------------------------------------------------------------------------------------------------------------------------------------------------------------------------------------------------------------------------------------------------------------------------|
| J.M. Ter Maaten et al, 2019<br>Retrospective study<br>N=798                 | Mean LVEF<35%<br>QRS>130 ms                                                        | <ul style="list-style-type: none"> <li>- Low survival rates and more hospitalizations for HF in presence of CKD stage 3-5 compared to those with CKD 1-2</li> <li>- Reverse cardiac remodeling across all stages, but with a lower response for those with moderate to severe renal dysfunction, especially in ESRD</li> <li>- Coservation of renal function after initiation of CRT in patients with eGFR&lt;60 ml/min/1,73 m<sup>2</sup> with a small improvement of eGFR at 6 months in responders compared with non-responders</li> </ul> |
| Levy et al, 2019<br>Observational study<br>N=1046                           | LVEF<35%<br>Mean LVEF=25%<br>410-CRT-D<br>636-CRT-P                                | <ul style="list-style-type: none"> <li>- High rate of mortality and number of admission for HF in CRT patients with moderate and severe CKD</li> <li>- Benefit in survival and hospitalizations rates in patients with CRT-D in comparison to CRT-P</li> </ul>                                                                                                                                                                                                                                                                                |
| Bazokis et al, 2017<br>Systematic review<br>16 studies<br>N= 7080           | Predominantly ischemic HF<br>NYHA II-IV<br>LVEF<30%                                | <ul style="list-style-type: none"> <li>- Significant higher rate of all-cause mortality in those with renal impairment; increased the risk of mortality with 66%</li> <li>- Improvement of glomerular filtration rate was associated with significant survival progress</li> </ul>                                                                                                                                                                                                                                                            |
| Bogdan et al, 2014<br>Single centre retrospective study<br>N= 179           | HF, mean LVEF=24%                                                                  | <ul style="list-style-type: none"> <li>- Low survival rate in patients with eGFR&lt;60 ml/min/1,73 m<sup>2</sup></li> <li>- Long-term survival benefit in CRT responders (at least 5% increasing of LVEF)</li> <li>- Renal impairment did not influence the clinical and functional response</li> <li>- The functional progress was independently linked with rise in long-term rate of survival</li> </ul>                                                                                                                                   |
| Gronka et al, 2015<br>Single centre retrospective study;<br>N= 375          | mean LVEF=28%, mean<br>QRS duration<br>0,154 s                                     | <ul style="list-style-type: none"> <li>- Higher mortality in patients with renal dysfunction (eGFR&lt;60 ml/min/1,73 m<sup>2</sup>)</li> <li>- Increased eGFR at 6 months after CRT implant was significantly associated with better survival for each 10 mL/min/</li> <li>- Baseline eGFR differed significantly between CRT responders (improved LVEF with &gt;10%) and non-responders</li> </ul>                                                                                                                                           |
| Jeevaantham et al, 2016<br>Retrospective study<br>N=588                     | 41% non-ischemic HF,<br>LVEF<35%                                                   | <ul style="list-style-type: none"> <li>- Benefit on mortality derived from prevention in renal failure progress</li> <li>- Stabilization of renal function with no significant eGFR deterioration, but without significant long-term effect on mortality</li> <li>- The most important benefit in eGFR improvement was showed in advanced CKD (stage 4 and 5) at 6 months of follow-up</li> <li>- CRT responder (LVEF increasing with &gt;5%) had a decreased mortality rate on short-term, without benefit on long-term</li> </ul>           |
| Singal et al, 2015<br>Single centre retrospective study<br>N=260            | Mean LVEF=24%<br>Mean QRS width=0,16 s<br>LBBB=51%                                 | <ul style="list-style-type: none"> <li>- Improvement of renal function in all CKD stages in patients with severe HF who received CRT</li> <li>- eGFR increasing was associated with a significant reduction of death, need for HT or necessity of (LVAD); the benefit was sustainable during 5 years follow-up</li> <li>- Better results appeared in patients already on treatment with ACEi/ARB, in those with more advanced CKD and increased LVEF (but no significant LVEF improvement in CKD stage II-IV)</li> </ul>                      |
| Moreira et al, 2018 Single centre study<br>N=178                            | 34 % ischemic HF 92%<br>NYHA II-IV median<br>LVEF=25%                              | <ul style="list-style-type: none"> <li>- Significantly lower survival in patients with eGFR below 60 ml/min at 12, 24 and 36 months; 5.5 times increased risk of death</li> <li>- CRT responders (&gt;15% reduction in end-systolic diameter of LV) had a better survival than non-responders</li> <li>- Renal response defined as &gt;10 ml/min increase of eGFR was significant only in CRT responders</li> <li>- The renal impairment did not significantly influence the echocardiographic response to CRT</li> </ul>                     |
| Daimee et al, 2015,<br>Retrospective analysis of MADTI-CRTD trial<br>N=1820 | HF, LVEF ≤30%, wide<br>QRS ≥0,13 s<br>1274 LBBB (32% CKD)<br>533 no-LBBB (35% CKD) | <ul style="list-style-type: none"> <li>- Patients with CRT-D, LBBB and eGFR&lt;60 ml/min, had a significant 2 fold higher risk of death than patients with mid-normal kidney function</li> </ul>                                                                                                                                                                                                                                                                                                                                              |

|                                                          |                                                                  |                                                                                                                                                       |
|----------------------------------------------------------|------------------------------------------------------------------|-------------------------------------------------------------------------------------------------------------------------------------------------------|
| Daly Jr. et al, 2016,<br>Retrospective analysis<br>N=432 | HF (60,7% ischemic)<br>LVEF <35%<br>Mean QRS 0,155 s<br>57%-LBBB | - Patients without or with mild renal disease had long-term lower mortality rates in comparison to those with moderate/severe CKD, including dialysis |
|----------------------------------------------------------|------------------------------------------------------------------|-------------------------------------------------------------------------------------------------------------------------------------------------------|

**Table S1: Studies on CRT – main findings for CKD patients**

CRT-cardiac resincronization therapy; ICD-implantable cardioverter defibrillator; CRT-D-cardiac resincronzation therapy with defibrillator, CRT-P cardiac resincronization therapy with pacemaker; CKD-chronic kidney disease; ESRD-End Stage Renal Disease; HD-haemodialysis; PD-peritoneal dialysis; LVEF-left ventricle ejection fraction; RRT-renal replacement therapy; eGFR-estimated Glomerular Filtration Rate; NYHA-New York Heart Association, LBBB=Left Bundle Branch Block; ACEi/ARB- angiotensin-converting enzyme inhibitor/angiotensin receptor blocker; N=numebr of patients;MI-miocardial infarction LVAD-left ventricle assist device; AKI-acute kidney injury;AKI-D=acute kidney injury requiring dilaysis; TIA= transient ischemic attack, RVF=right ventricle failure; CHF=congestive heart failure; HT-heart transplantation; BTT-bridge to transplant, DT-destination therapy, KT-kidney transplant, PM-pacemaker, VF=ventricular fibrillation, VT-ventricular tachycardia, SCA-sudden cardiac arrest

| Device                                                                                          | Study design                                                                                                             | Population characteristics                                                                   | Principal findings                                                                                                                                                                                                                                                                                                          |
|-------------------------------------------------------------------------------------------------|--------------------------------------------------------------------------------------------------------------------------|----------------------------------------------------------------------------------------------|-----------------------------------------------------------------------------------------------------------------------------------------------------------------------------------------------------------------------------------------------------------------------------------------------------------------------------|
| <b>ICD</b><br><br>(both primary and secondary prevention-no separation according to indication) | Makki et al, 2014<br><br>Meta-analysis of 5 retrospective studies<br><br>N=17460                                         | 2854 –ICD recipients<br><br>14606 – control<br><br>LVEF<30%                                  | - Significantly lower overall mortality in CKD patients with ICD                                                                                                                                                                                                                                                            |
|                                                                                                 | Makki et al, 2014<br><br>Meta-analysis of 15 studies (13-retrospective, 2-prospective)<br><br>N=5233                     | Board spectrum of EF (25-58%)                                                                | - The risk of death was significantly increased by renal impairment (2.86 times higher in CKD group)                                                                                                                                                                                                                        |
|                                                                                                 | Fu et al, 2017<br><br>Meta-analysis<br><br>11 studies<br><br>N=20196                                                     | LVEF<31%<br><br>5 studies included dialysis patients<br><br>ICD -4178<br><br>Non-ICD -16018  | - Benefit in survival after ICD implantation in stage 3 patients, but did not indicate any advantage in CKD 4-5<br><br>- Patients with CKD were more exposed to electric storm and had a greater risk of SCD<br><br>- CKD stage 4 was an independent factor in predicting time to first appropriate internal electric shock |
|                                                                                                 | Shurrab et al, 2018<br><br>Meta-analysis of 11 retrospective studies N=21136<br><br>7/11 studies-ICD vs non ICD (N=8041) | ICD-1419<br><br>Non-ICD-6622<br><br>4/7 studies – included dialysis patients<br><br>LVEF<30% | - ICD therapy was associated with better survival rates in patients with eGFR<60ml/min, inclusive dialysis                                                                                                                                                                                                                  |
|                                                                                                 | Kiage et al<br><br>Systematic review<br><br>42 studies                                                                   | LVEF<35%<br><br>CKD and ESRD                                                                 | - CKD patients with ICD experienced more death events and CKD was associated also with elevated burden of antitachycardia pacing or shocks                                                                                                                                                                                  |
| <b>ICD</b><br><br><b>Primary prevention</b>                                                     | Pun et al, 2014<br><br>Systematic review and meta-analysis                                                               | Symptomatic HF with<br><br>LVEF<35%                                                          | - Decline of eGFR is associated with reduction of benefit on mortality for patients with ICD<br><br>- ICD patients with eGFR below 60 ml/min/1,73 m <sup>2</sup> had lower survival rates compared with those with no or mild renal disease and non-ICD                                                                     |

|                                         |                                                                                                            |                                                                                         |                                                                                                                                                                                                                                                                                                                                                                                                                                                                                                                                                                                         |
|-----------------------------------------|------------------------------------------------------------------------------------------------------------|-----------------------------------------------------------------------------------------|-----------------------------------------------------------------------------------------------------------------------------------------------------------------------------------------------------------------------------------------------------------------------------------------------------------------------------------------------------------------------------------------------------------------------------------------------------------------------------------------------------------------------------------------------------------------------------------------|
|                                         | Bansal et al, 2018<br>Noninterventional<br><br>cohort study<br><br>N=5,877                                 | LVEF <40%<br><br>ICD-1556<br><br>No-ICD-4321                                            | - No difference regarding all-cause mortality between ICD and no-ICD groups<br><br>- ICD was associated with elevated rate of hospitalisations for HF or for any-cause among CKD patients                                                                                                                                                                                                                                                                                                                                                                                               |
|                                         | Pun et al, 2015 Propensity Match<br>Analysis<br><br>N=172                                                  | LVEF<35%<br><br>Dialysis patients:<br><br>ICD=86<br><br>No-ICD=86                       | - ICD did not improve survival at 1 or 3 years in dialysis patients                                                                                                                                                                                                                                                                                                                                                                                                                                                                                                                     |
|                                         | Joukema et al, 2019, RCT<br><br>N=188                                                                      | patients on HD/PD with<br>LVEF > 35%                                                    | - There was no associated benefit on survival rate with similar rate of ICD related complications                                                                                                                                                                                                                                                                                                                                                                                                                                                                                       |
|                                         | Hess et al, 2014, retrospective<br>study,<br><br>N=47,282                                                  | Prior MI and LVEF<30%<br>or CHF and LVEF<35%                                            | - Risk of mortality after ICD placement was significantly greater in patients with renal disease<br><br>- The burden of death was proportional with more affected GFR; the risk of death doubled for eGFR between 30-60 ml/min; those with severe CKD (eGFR < 30 ml/min) had an 4,2 times increased hazard for mortality in ESRD/dialysis patients with a 4.8 greater risk of death                                                                                                                                                                                                     |
| <b>ICD<br/>Secondary<br/>Prevention</b> | Liu et al, 2021 Systematic review<br>and meta-analysis<br><br>26 studies overall<br><br>N=199,263 patients | LVEF<35%<br><br>5/26 studies – ICD for<br>secondary prevention                          | - Reduced risk of all-cause mortality in patients with renal insufficiency with ICD for secondary prevention of SCD than in the non-ICD group<br><br>- CKD significantly increases the mortality of any cause                                                                                                                                                                                                                                                                                                                                                                           |
|                                         | Payne et al<br><br>Retrospective analysis<br><br>N=43,519                                                  | HD or PD patients who<br>survived<br><br>VF,VT, SCA<br><br>3,4% (1,442) received<br>ICD | - Rate of survival was considerable higher in the ICD group versus no-ICD (53% vs 27%); 46% decreased hazard of death and significant prolonged life expectancy (2,19 years versus 0,58 years)<br><br>- Principal risk factors for increased probability of mortality were higher burden of comorbidities (higher Charlson Comorbidity Index-CCI), septic events, pulmonary embolism, haemodialysis as initiation method of dialysis, predominantly for those on venous catheter or arteriovenous graft than on arteriovenous fistula, smoker status, alcohol use or hepatitis (B or C) |
| <b>CRT-D<br/>Vs<br/>ICD only</b>        | Friedman et al, 2015,<br>Retrospective study,<br><br>N=10946<br><br>CRTD-9525, ICD-1421                    | LVEF <35%<br><br>QRS > 0,12 s                                                           | - CRT-D significantly decreased mortality and hospitalisations for HF compared to ICD alone, across CKD 3-5D stages<br><br>- No difference in complications for CRT-D therapy comparative to ICD<br><br>- No significant difference in rate of progression to end-stage renal disease                                                                                                                                                                                                                                                                                                   |
|                                         | Liu et al, 2021<br><br>Systematic review and                                                               | LVEF<35%<br><br>6/26 studies – CRT-D VS<br>ICD                                          | - CRT-D therapy improves survival in comparison to ICD alone in patients with chronic renal disease<br><br>- Lower survival rate in dialysis patients compared to non-dialysis for both CRT-D or ICD patients                                                                                                                                                                                                                                                                                                                                                                           |

|  |                                                                                                                             |                                                                                                   |                                                                                                                                                                                                                                                                                                                                                                                                                    |
|--|-----------------------------------------------------------------------------------------------------------------------------|---------------------------------------------------------------------------------------------------|--------------------------------------------------------------------------------------------------------------------------------------------------------------------------------------------------------------------------------------------------------------------------------------------------------------------------------------------------------------------------------------------------------------------|
|  | Meta-analysis<br><br>26 studies overall<br><br>N=199263 patients                                                            |                                                                                                   |                                                                                                                                                                                                                                                                                                                                                                                                                    |
|  | Shurab et al, 2018<br><br>Meta-analysis of 11 retrospective studies N=21136<br><br>4/11 studies-CRT-D vs ICD only (N=13095) | CRT-D-10838<br><br>ICD only -2257<br><br>3/4 studies – included dialysis patients<br><br>LVEF<27% | - Significant benefit on survival from CRT-D therapy over ICD only in CKD patients, including dialysis                                                                                                                                                                                                                                                                                                             |
|  | Daimee et al, 2015,<br><br>Retrospective analysis of MADTL-CRTD trial<br><br>N=1820                                         | HF, LVEF ≤30%, wide QRS ≥0,13 s<br><br>1274 LBBB (32% CKD)<br><br>533 no-LBBB (35% CKD)           | - LBBB patients and moderate kidney dysfunction who received CRT-D had a significant better survival and less HF related events comparing to those with ICD only<br><br>- CRT-D did not improve rate of mortality in those with normal renal function, but had a significant effect on reducing events caused by HF<br><br>- Non-LBBB patients had no survival benefit from CRT-D over ICD only, no matter of eGFR |

**Table S2: Studies on ICD – main findings for CKD patients**

**CRT**=cardiac resynchronization therapy; **ICD**=implantable cardioverter defibrillator; **CRT-D**=cardiac resynchronization therapy with defibrillator, **CRT-P** cardiac resynchronization therapy with pacemaker; **CKD**=chronic kidney disease; **ESRD**=End Stage Renal Disease; **HD**=haemodialysis; **PD**=peritoneal dialysis; **LVEF**=left ventricle ejection fraction; **RRT**=renal replacement therapy; **eGFR**=estimated Glomerular Filtration Rate; **NYHA**=New York Heart Association, **LBBB**=Left Bundle Branch Block; **ACEi/ARB**= angiotensin-converting enzyme inhibitor/angiotensin receptor blocker; **N**=number of patients;**MI**=myocardial infarction **LVAD**=left ventricle assist device; **AKI**=acute kidney injury;AKI-D=acute kidney injury requiring dialysis; **TIA**= transient ischemic attack, **RVF**=right ventricle failure; **CHF**=congestive heart failure; **HT**=heart transplantation; **BTT**=bridge to transplant, **DT**=destination therapy, **KT**=kidney transplant, **PM**=pacemaker, **VF**=ventricular fibrillation, **VT**=ventricular tachycardia, **SCA**=sudden cardiac arrest

| Devices                          | Study design                                                                           | Population characteristics                                                       | Principal findings                                                                                                                                                                                                                                                                                                                                                                                                                                                                                                                                                                                                                                                             |
|----------------------------------|----------------------------------------------------------------------------------------|----------------------------------------------------------------------------------|--------------------------------------------------------------------------------------------------------------------------------------------------------------------------------------------------------------------------------------------------------------------------------------------------------------------------------------------------------------------------------------------------------------------------------------------------------------------------------------------------------------------------------------------------------------------------------------------------------------------------------------------------------------------------------|
| <b>LVAD<br/>And<br/>CKD/ESRD</b> | Mohamedali et al, 2017, Single centre retrospective study<br>N=213                     | Advanced HF patients<br><br>LVAD indicated as BTT or DT                          | <ul style="list-style-type: none"> <li>- Significantly higher mortality in patients with eGFR&lt;60ml/min before LVAD implant compared to those with normal renal function</li> <li>- Higher incidence of stroke or TIA, hospitalisations for HF and RVF in patients with eGFR&lt;60 ml/min pre-LVAD</li> <li>- No-improvement in renal dysfunction increased mortality</li> <li>- Those with improvement in eGFR (post-LVAD) or absence of depressed kidney function pre and post-LVAD had a low incidence of RVF and HF admission</li> <li>- Incidence of stroke was higher in those with baseline eGFR below 60 ml/min, irrespective of renal function evolution</li> </ul> |
|                                  | Doshi et al., 2020,<br><br>Retrospective observational study<br><br>N=20656            | Stage D HF<br><br>All CKD stages, including HD/PD                                | <ul style="list-style-type: none"> <li>- Increased risk of death in stages IV-V or ESRD patients compared to early stages of CKD (I-III)</li> <li>- CKD patients had longer hospitalization periods, greater financial costs and increased necessity for transitional care services at discharge</li> </ul>                                                                                                                                                                                                                                                                                                                                                                    |
|                                  | Ajmal et al.,2020<br><br>Retrospective study<br><br>N=137                              | LVAD for Class III or IV NYHA HF (ischemic and non-ischemic)                     | <ul style="list-style-type: none"> <li>- Higher mortality in patients requiring LVAD with CKD at baseline</li> </ul>                                                                                                                                                                                                                                                                                                                                                                                                                                                                                                                                                           |
|                                  | Ibrahim et al, 2021,<br><br>Systematic review,<br><br>7 studies<br><br>N=26652         | 4630 patients with renal dysfunction (eGFR<60ml/min)<br><br>LVAD for advanced HF | <ul style="list-style-type: none"> <li>- High risk of death in patients with chronic renal disease</li> </ul>                                                                                                                                                                                                                                                                                                                                                                                                                                                                                                                                                                  |
|                                  | Bansal et. al,2018,<br><br>Retrospective study<br><br>N=416<br><br>ESRD=155;nonERD=261 | LVAD used for BTT or DT<br><br>ESRD:HD, PD and KT                                | <ul style="list-style-type: none"> <li>- Patients in CKD final stage had significantly increased mortality (81,9% vs 36,4%) in comparison with non-ESRD group</li> <li>- Most ESRD patients died in the first 3 weeks</li> <li>- Most ESRD died without having received a heart transplantation</li> <li>- In non-ESRD group, only 25% of patients received HT</li> </ul>                                                                                                                                                                                                                                                                                                      |
|                                  | Dalia et al, 2022<br><br>Retrospective study<br><br>N=591                              | 496 patients with CKD, 95 patients with dialysis/ESRD underwent LVAD             | <ul style="list-style-type: none"> <li>- Dialysis (ESRD) patients had a significantly higher mortality rates when compared to patients with CKD (without need for dialysis)</li> </ul>                                                                                                                                                                                                                                                                                                                                                                                                                                                                                         |
|                                  |                                                                                        |                                                                                  |                                                                                                                                                                                                                                                                                                                                                                                                                                                                                                                                                                                                                                                                                |

|                                             |                                                                 |                                                     |                                                                                                                                                                                                                                                                                                                                                                                                                                                                                           |
|---------------------------------------------|-----------------------------------------------------------------|-----------------------------------------------------|-------------------------------------------------------------------------------------------------------------------------------------------------------------------------------------------------------------------------------------------------------------------------------------------------------------------------------------------------------------------------------------------------------------------------------------------------------------------------------------------|
|                                             | Lakhdar et al, 2022,<br>Systematic Review<br>13 articles        | ESRD patients with<br>LVAD as BBT or DT             | <ul style="list-style-type: none"> <li>- Increased LVAD use in ESRD patients (from 3,3 % in 2010 to 5,2 % in 2014)</li> <li>- Decrease in mortality incidence (from 68% in 2010 to 54% in 2014)</li> <li>- Generally higher rate of death in ESRD patients compared with no-ESRD</li> <li>- No clear or direct association between mortality and ESRD; LVAD complications, older age and comorbidities could be also factors leading to increased mortality and poor prognosis</li> </ul> |
| <b>LVAD and<br/>Acute Kidney<br/>Injury</b> | Wettersten et al, 2021<br>Observational study<br>N=131          | 47% of patients – pre-<br>existing CKD              | - LVAD implantation was associated with an improvement of kidney function at 1 month                                                                                                                                                                                                                                                                                                                                                                                                      |
|                                             | Silver et al, 2020,<br>Retrospective study<br>N=8362 patients   | LVAD patients noHD<br>AKI -3760<br><br>AKI-D - 436  | <ul style="list-style-type: none"> <li>- LVAD implantation is associated with significant more in-hospital deaths</li> <li>- LVAD related complications: bleeding, sepsis or discharge to a nursing facility</li> </ul>                                                                                                                                                                                                                                                                   |
|                                             | Muslem et al, 2018,<br>Retrospective multicentre study<br>N=241 | LVAD implantation<br><br>169 (70%) developed<br>AKI | - Development of acute kidney injury after LVAD implantation is also associated with higher mortality and decreased renal function at 12 months distance                                                                                                                                                                                                                                                                                                                                  |

**Table S3: Studies on LVAD – main findings for CKD patients**

CRT-cardiac resynchronization therapy; ICD-implantable cardioverter defibrillator; CRT-D-cardiac resynchronization therapy with defibrillator, CRT-P cardiac resynchronization therapy with pacemaker; CKD-chronic kidney disease; ESRD-End Stage Renal Disease; HD-haemodialysis; PD-peritoneal dialysis; LVEF-left ventricle ejection fraction; RRT-renal replacement therapy; eGFR-estimated Glomerular Filtration Rate; NYHA-New York Heart Association, LBBB=Left Bundle Branch Block; ACEi/ARB- angiotensin-converting enzyme inhibitor/angiotensin receptor blocker; N=number of patients; MI-miocardial infarction  
LVAD-left ventricle assist device; AKI-acute kidney injury; AKI-D=acute kidney injury requiring dialysis; TIA= transient ischemic attack, RVF=right ventricle failure; CHF=congestive heart failure; HT-heart transplantation; BTT=bridge to transplant, DT=destination therapy, KT-kidney transplant, PM-pacemaker, VF=ventricular fibrillation, VT-ventricular tachycardia, SCA-sudden cardiac arrest
